# Supplementary material for: Single-crystal MAPbI3 microwire arrays by a bilayer flexible interface confinement method for photodetectors
Source: Royal Society of Chemistry journal article supplement (doi:10.1039/d3ce00129f), 2023-01-01
Supplement: d3ce00129f1.pdf [file d3ce00129f1.pdf]

## Electronic Supplementary Information

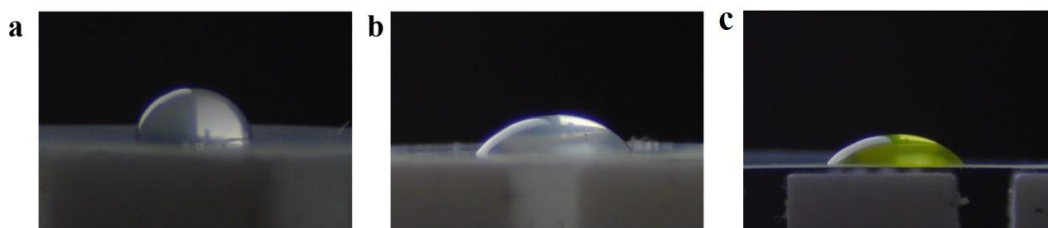

**Figure S1.** The contact angles of (a) H<sub>2</sub>O/PEM and (b) DMF/PEM (c) precursor DMF solution/PEM.

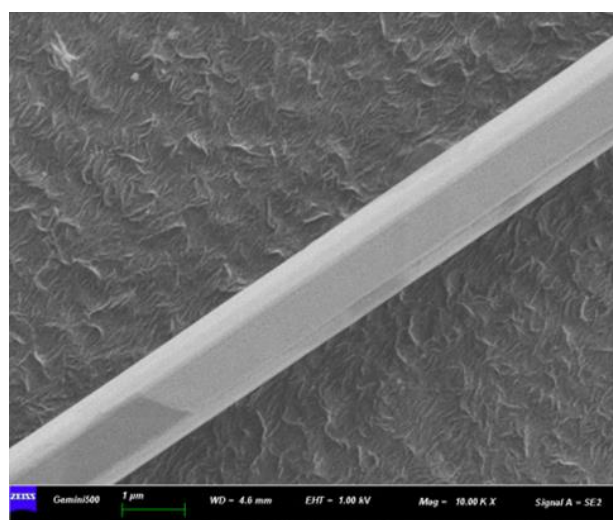

**Figure S2.** FESEM image of thin MAPbI<sub>3</sub> MW.

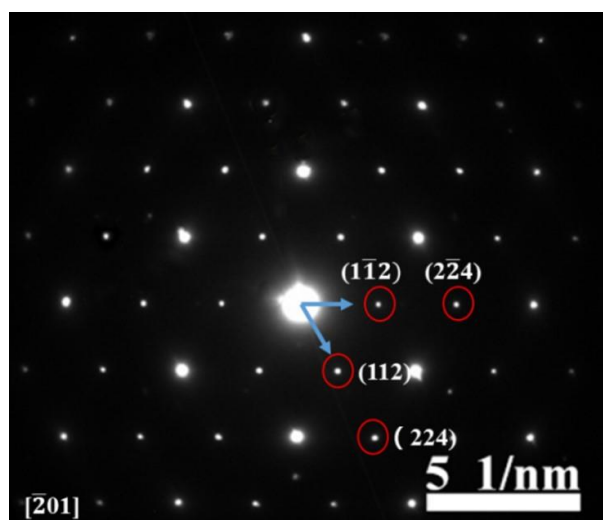

**Figure S3.** Selected area electron diffraction pattern of MAPbI<sub>3</sub> MW.

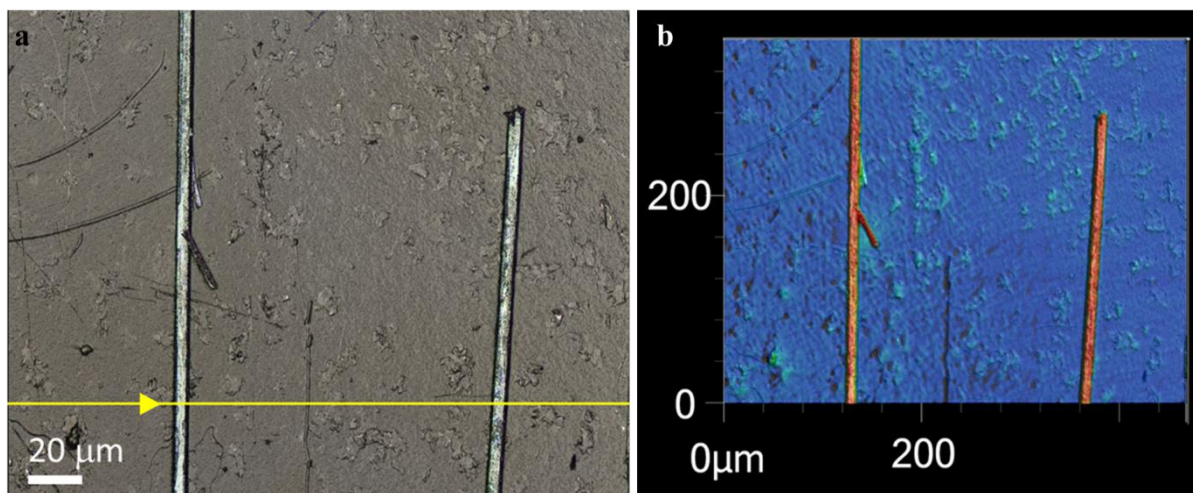

**Figure S4.** (a) 2D and (b) 3D laser optical micrographs of MAPbI<sub>3</sub> MWs.

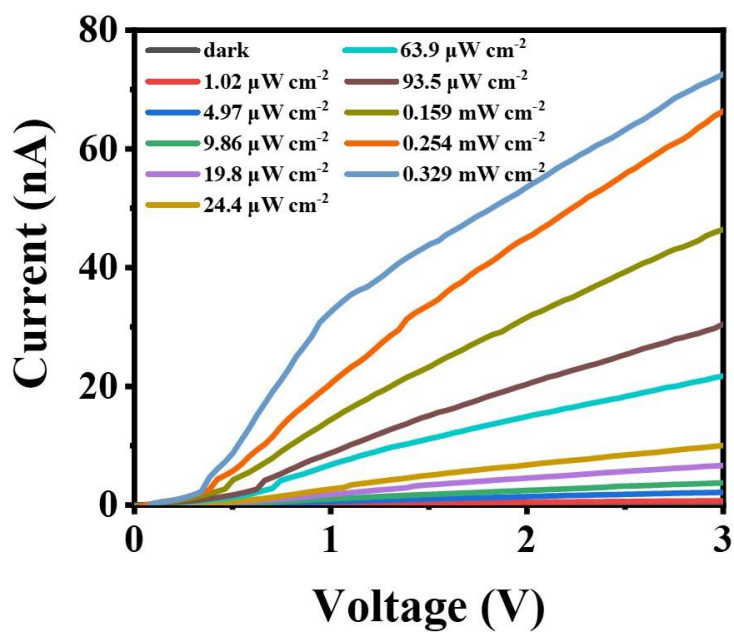

**Figure S5** I-V curves of MAPbI<sub>3</sub> MW arrays under 523 nm LED illumination with different light intensities at 3 V bias.

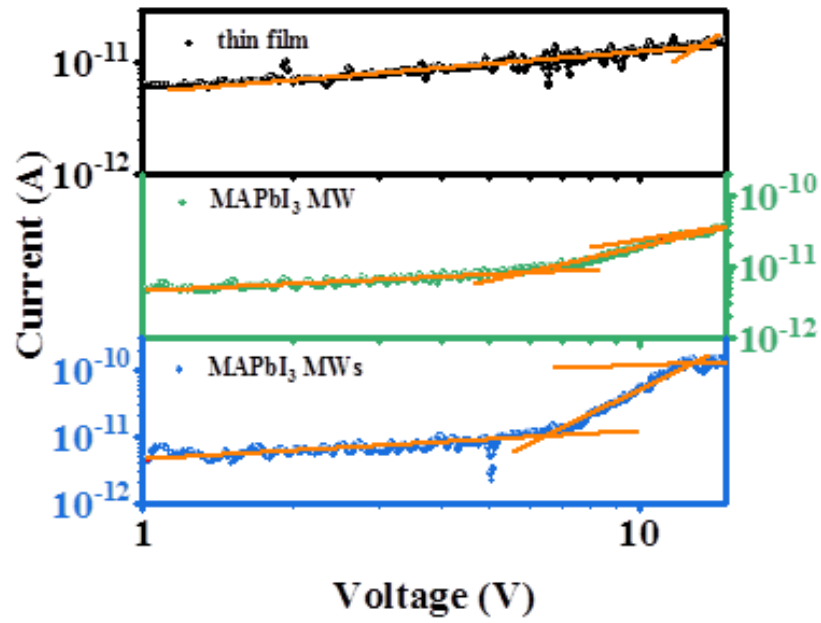

**Figure S6** I-V plots of single-crystal MAPbI<sub>3</sub> MW, MW arrays, and thin film by space charge limited current method.
